---

# QuoVidi : a open-source web application for the organisation of large scale biological treasure hunts

Guillaume Lobet<sup>1,2</sup>, Charlotte Descamps<sup>1</sup>, Lola Leveau<sup>1</sup>, Alain Guillet<sup>3</sup>, Jean-François Rees<sup>4</sup>

1. UCLouvain, Faculty of Bioengineering, Louvain-la-Neuve, Belgium

2. Forschungszentrum Jülich, Agrosphere Institute, Juelich, Germany

3. UCLouvain, Support en méthodologie et calcul statistique, Louvain-la-Neuve, Belgium

4. UCLouvain, Louvain Institute of Biomolecular Science and Technology & School of Biology,  
Louvain-la-Neuve, Belgium

---

## Abstract

Learning biology, and in particular systematics, requires learning a substantial amount of specific vocabulary, both for botanical and zoological studies. While crucial, the precise identification of structures serving as evolutionary traits and systematic criteria is not per se a highly motivating task for students. Teaching this in a traditional teaching setting is quite challenging especially with a large crowd of students to be kept engaged. This is even more difficult if, as during the COVID-19 crisis, students are not allowed to access laboratories for hands-on observation on fresh specimens and sometimes restricted to short-range movements outside their home.

Here we present QuoVidi, a new open-source web platform for the organisation of large scale treasure hunts. The platform works as follows: students, organised in teams, receive a list of quests that contain morphologic, ecologic or systematic terms. They have to first understand the meaning of the quests, then go and find them in the environment. Once they find the organism corresponding to a quest, they upload a geotagged picture of their finding and submit this on the platform. The correctness of each submission is evaluated by the staff. During the COVID-19 lockdown, previously validated pictures were also submitted for evaluation to students that were locked in low-biodiversity areas. From a research perspective, the system enables the creation of large image databases by the students, similar to citizen-science projects.

Beside the enhanced motivation of students to learn the vocabulary and perform observations on self-found specimens, this system allows faculties to remotely follow and assess the work performed by large numbers of students. The interface is freely available, open-source and customizable. It can be used in other disciplines with adapted quests and we expect it to be of interest in many classroom settings.

---

## Keywords

34 Active learning, biology, systematics, remote learning, gamification

## Introduction

36 Teaching biology to first-year bachelor students is a challenge. As educators,  
37 our aim is usually twofold. First, we want the students to learn a new set of  
38 knowledge and integrate it. Second, and this is for us equally important, we  
39 want the students to engage with the topic at hand. We want to transmit our  
40 passion and curiosity about the topic that we teach. Third, we also want  
41 students to learn to observe the world around them. It is one thing to learn a  
42 topic from a textbook, it is another to observe it in real life. However, the main  
43 issue is that the classroom is, often by design, completely disconnected from  
44 the natural world. The challenge is therefore to find a way for students to  
45 learn and engage with biology, despite that given disconnection. Last but not  
46 least, in the Spring semester of 2020 (January to June) it was necessary for us  
47 to adapt the learning activities to the containment measures related to  
48 COVID-19.

49 The formal aim of our biology course - given in the Bioengineering Faculty,  
50 UCLouvain, Belgium - is to discover plant and animal structures, organs and  
51 their function at the individual scale. To achieve this, students need to learn  
52 specific vocabulary related to these structures. The classic way to present this  
53 vocabulary to a student audience is to review a series of slides illustrating  
54 these different characteristics. This vocabulary is usually very boring for  
55 teachers to describe (imagine the slides showing all the different shapes of  
56 leaves) and the content is not very interesting for students to listen to either.  
57 Yet this vocabulary is an important prerequisite for describing any biological  
58 structure and for later systematic identification of taxons using dichotomous  
59 keys . Its learning is essential. The question is therefore how to make this  
60 learning process motivating for the students and give them the opportunity to  
61 learn over time instead of memorising a list of words? The additional difficulty  
62 is that this learning activity must be able to be set up with more than 300  
63 students and few teaching resources.

64 To create this learning activity, we decided to draw inspiration from all the  
65 pedagogical techniques that aim to place the student at the centre of his  
66 learning. Student-centred learning and active learning emerged as important  
pedagogical techniques during the last century [REF]. Active learning is

68 characterised by (i) involving the student in the construction of his or her  
learning, (ii) engaging the student in an in-depth treatment of the subject  
70 matter, (iii) constructing learning through interaction (with the teacher or  
other students), (iv) conceiving of learning as the evolution of knowledge and  
72 skills [1,2]. Studies have shown that the more cognitively and socially  
engaged the student is in a learning task, the more perennial the learning task  
74 becomes [1,3]. Active learning improves the performance of students and acts  
to reduce the gap achievement between advantaged and disadvantaged  
76 students [4]. In order to stimulate learning through interaction and create a  
collective emulation around this activity, the idea of creating a campus-wide  
78 biological treasure hunt finally emerged from the discussions. Beyond simply  
being active through the manipulation of information, the student has to  
80 transform and produce new information that is not provided in the learning  
material.

82 Gamification is another recent technique to better engage the students in a  
learning activity. Gamification is defined by [5] as “game-based mechanics,  
84 aesthetics, and game thinking to engage people, motivate action, promote  
learning, and solve problems”. In many studies, students’ levels of engagement  
86 increased significantly following the introduction of game elements, such as  
points, challenges, quests or progress bar [6]. The gamified environment  
88 can afford intrinsic motivation and engagement, which are also targeted by  
active learning.

90 To assemble these different elements - biological vocabulary, observation,  
active learning and gamification - in a comprehensive learning activity, we  
92 created a large scale biological treasure hunt for our students. In short, we  
provided students with a list of specific biological vocabulary. They had to  
94 understand the list and find the different elements outside of the classroom,  
in the natural world. External resources (books, selected websites, wiki pages)  
96 describing this vocabulary were available to them. Complexity of  
understanding (some words are more difficult than others) as well as the  
98 difficulty of identification in the field were rewarded with different points.

To manage the treasure hunt, we designed a new web-based platform,  
100 QuoVidi (which would loosely translate from latin as “where did you see”), for  
the organisation of large scale, decentralised, biological treasure hunts.  
102 QuoVidi is an open-source project available at [www.quovidi.xyz](http://www.quovidi.xyz). The objective  
of this publication is to describe the project, to show how we were able to  
104 adapt this learning activity to the covid-19 crisis, and finally, to show the  
results and success of the activity with the students.

106

## Presentation of QuoVidi

108

QuoVidi is a web application for the organisation and management of large scale biological treasure hunts. It was created to teach students to learn new biological terms (both in zoology and botany) and to teach them to observe the natural world surrounding them.

110

### Setting up the activity

112

First, educators have to prepare a list of quests to find in the natural world.

114

These quests should be tailored and adapted for the target public. For

116

instance, in our experience with first year biology students, the quests revolved around biological structures and families (tab. 1). Each quest is given

118

a specific reward (points) depending on its intrinsic difficulty and rareness. Quests can be sorted in different groups (for instance “animal” and “plant”) and subgroups (for instance “animal species” and “leaf shapes”) to help students navigate them.

120

**Table 1 : Examples of quests used in the QuoVidi activity.** Quests are sorted in the different groups and subgroups to help students navigate them. Each quest yields a number of points depending on its difficulty.

122

| quest                                   | group  | subgroup                   | points |
|-----------------------------------------|--------|----------------------------|--------|
| Find an achene                          | plant  | types of fruits            | 1      |
| Find a flower with a bilateral symmetry | plant  | types of flowers           | 2      |
| Find a Siphonaptera                     | animal | animal groups              | 3      |
| Find an example of aposematism          | animal | animal physical attributes | 1      |

124

Second, educators have to assign students to groups to perform the activity.

126

Students in the same group will be able to share pictures and collaborate on the data collection. When logging into the web interface, students will be able to see the collected pictures and rewards from their own group. They will also be able to see the total number of points of the competing groups.

128 Educators also have the possibility to define specific game parameters, such  
130 as specific geographic regions in which the game takes place or restriction on  
the number of submissions in each quest group (adding for instance a point  
penalty below a certain number of “animal” or “plant” submissions).

132 Once the list of quests, users and groups are defined, the activity can start.  
Two main activities are available for the students : an *in situ* treasure hunt and  
134 an *ex situ* photo quiz activity.

## Treasure hunt

136 The main activity of the platform is the biological treasure hunt. Students  
have to go outside (although some of the creatures may be also found in their  
138 home such as food parasites, e.g. *Lepisma* sp. or flies) to find the different  
quests setup by the educators. Once they find a specific quest, they have to  
140 take a picture of it with their smartphone. We ask the student to take  
unambiguous pictures, where the subject of the quest is clearly identified and  
142 visible. We also ask them to leave the natural environment intact, without  
killing any plant or animal in the process.

144 They can then store the picture on the QuoVidi web interface. When stored,  
pictures are automatically resized (for efficiency) and added to the activity  
146 database. Localisation information and date are extracted from the picture  
EXIF metadata. Any other information is erased at this step.

148 Once pictures are stored on the web interface, students can assign them to a  
specific quest and submit it for evaluation. The web application allows users  
150 to follow their progress in detail (which picture was submitted for which  
quest, what is the evaluation status, etc.) as well as the global progress of the  
152 other groups (the total number of collected points).

154 It is worth noting that in Belgium - where the web application was first used -  
the lockdown due to the COVID-19 pandemic still allowed citizens to go  
outside for some walk and exercise, although at a limited range. As such, the  
156 treasure hunt could still be performed by the students, either in their own  
garden or in neighbouring areas. However, not everyone lives in the  
158 countryside or close to a natural environment, or had the opportunity to leave  
their home during the lockdown. This is why we created a second module in  
160 the interface, the photo quiz, which allowed students to learn from photos  
contributed by other students, without having to submit their own photos.

162

## Photo quiz

164

166

168

170

The second module of the interface allows students to evaluate pictures submitted by other students (a modified version of peer evaluation). More precisely, in the photo quiz module, students are presented with pictures submitted by other groups and validated by the educators (see below “Expert evaluation”). They have to assess whether the picture corresponds to its assigned quests. Their assessment is then compared to the assessment of the educators. If it matches, the students gain points that are added to their global group tally.

172

174

When performing this activity for the first time, it is necessary to have a sufficient amount of submitted (and corrected pictures). Without a database large enough, the activity loses some of its interest, as students might all review the same pictures.

## Expert evaluation

176

178

180

182

The third important module of the interface, central to the activity, is the expert evaluation. Each submitted picture needs to be manually assessed by the educators. Different feedback can be given for each submission, such as “correct”, “correct and nice picture”, “incorrect”, “not visible” (e.g. the object is not visible in the picture) or “out of rules” (e.g. picture of a houseplant, picture taken outside of the prescribed geographical zones). The interface was designed to easily navigate the different quests and quickly correct the submitted images.

184

## Technical aspects of the web application

186

188

190

192

194

The web application was created using the R Shiny framework, using the `shinydashboard` [7], `shiny` [8], `shinyWidgets` [9], `shinyBS` [10], `miniUI` [11] packages for the user interface design. The data is stored in a SQLite database, hosted on the server. The database management is done using the `DBI` [12] and `RSQLite` [13] packages. Pictures are transformed and managed using the `magick` [14] package. EXIF information is extracted using the `exifr` [15] package. Data manipulation and visualisation is done using the `tidyverse` [16], `lubridate` [17], `cowplot` [18], `formattable` [19], `DT` [20], `plyr` [21], `leaflet` [22] packages. The text sentiment analysis was performed using the `rfeel` package [23].

196

In our exemple, the web application was deployed on the university server with the following specifications: Ubuntu 18.04.4 LTS x86-64, Linux kernel 4.15.0 x86-64, R 3.6.2 x86-64, Shiny server 1.5.12.933 .

198

## Data accessibility

200

QuoVidi is an open source project, released under an APACHE licence [24]. Everyone is free to re-use and modify it, with attribution.

202

- Project website : <http://www.quovidi.xyz>
- Source code : [https://github.com/QuoVidi/quovidi\\_public](https://github.com/QuoVidi/quovidi_public)
- Script and data used for the manuscript :  
<http://www.doi.org/10.5281/zenodo.3909033>

204

## Results

206

### The web interface

208

The interface was created to be as much user-friendly as possible so that neither students nor staff need technical training . Because it is web based, it can be used on any platform, whatever the operating system . It scales on mobile devices as well, allowing users to store and submit pictures directly from the field (if they have an internet connection).

210

212

Figure 1 shows the different panels of the web interface. Figure 1A shows the “Store” panel, where students can store pictures, before submitting them for evaluation. This allows students from the same group to share and visualise their pictures. At this step, students can already assign a quest to the picture, which can be changed later on. They can also assign a geographic region, if this is required by the educators. A default region will be automatically proposed, based on the metadata of the picture.

214

216

218

220

Figure 1B shows the “Submit” panel. At this stage, students see all the pictures from their group. They can select a stored picture, assign it to a quest and submit it for evaluation. Groups can only submit one picture for each quest.

222

224

Figure 1C shows the “Bounty” panel, where students can visualise their progress. The panel presents an overview of the activity progress (for instance the total number of points or number of submitted quests). Students can also see the status of individual submissions, whether they are submitted

226

228 or not as well as their validation status. In the same panel, students can also  
230 see the global scores of each group taking part in the activity. This adds a  
232 strong gamification aspect to the activity.

230 Figure 1D shows the “Quests” panel. In that panel students can navigate  
232 through the different quests proposed by the educators. They can sort them  
234 by groups, subgroups or rewards. In this panel, no explanation is given for the  
different quests. For instance if the quest is “Find an achene”, we do not define  
achene. This is done by design. We want students to look up the different  
biological terms by themselves. We do provide them with ressources to do so.

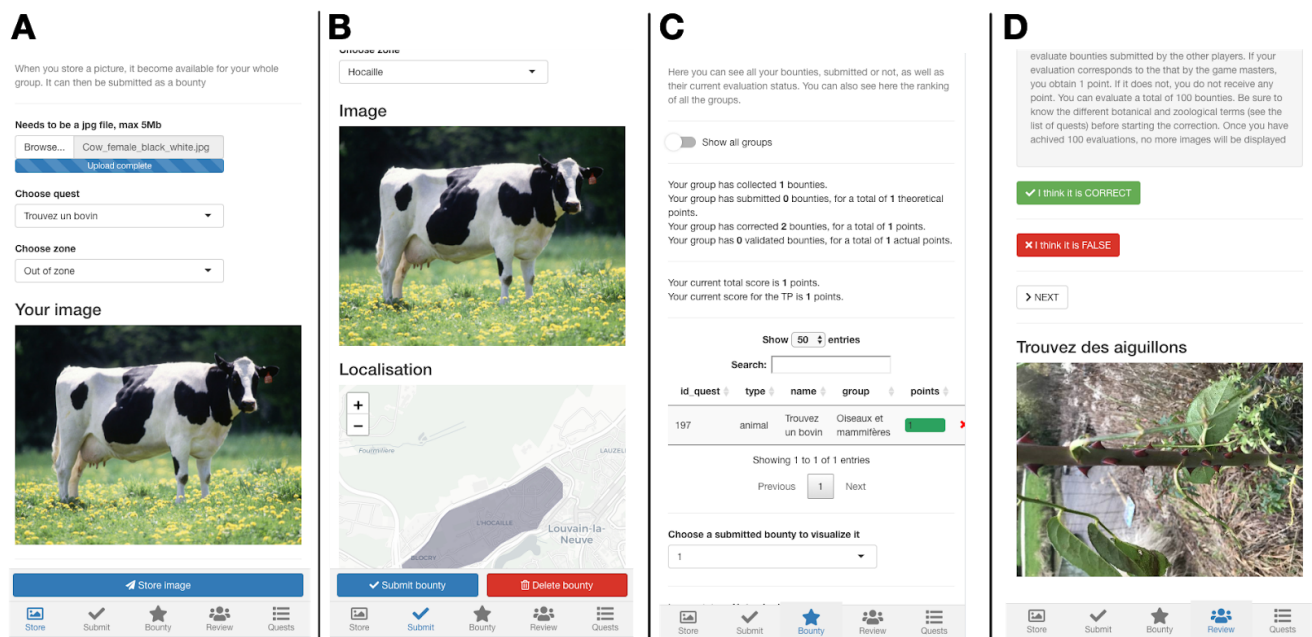

236 **Figure 1 : Overview of the different panels of the web interface.** A. Store panel, where students can load the  
238 pictures taken in the field into the interface. B. Submit panel, where students can see all the stored pictures  
240 from their group and choose the ones to submit for evaluation. C. Bounty panel, where students can track the  
progress of their group and the others, as well as the expert evaluation of their submitted images. D. Review  
panel, where students can perform the photo quiz module.

242 When an educator logs into the web application, the “Quests” panel becomes  
244 the “Admin” panel. In this panel, educators can follow the evolution of the  
246 activity (fig. 2A), change the activity parameters (fig. 2B) or correct the  
student submissions (fig 2C). Depending on the number of participating  
students and allowed submissions, the number of corrections can quickly  
become quite large. Therefore we designed the corrections interface to be  
fast and efficient. The educator first chooses one quest to correct. He/She will



248 be presented with submissions for that quest only. The corrections are done  
250 in one click, on the appropriate feedback button. Previously validated  
252 submissions for this quest are presented on the side panel, to help maintain  
the consistency of the evaluations. The validated pictures are also a useful  
help for educators with a lesser expertise. Our experience shows that it takes,  
on average, 5-10 seconds to evaluate one submission.

254

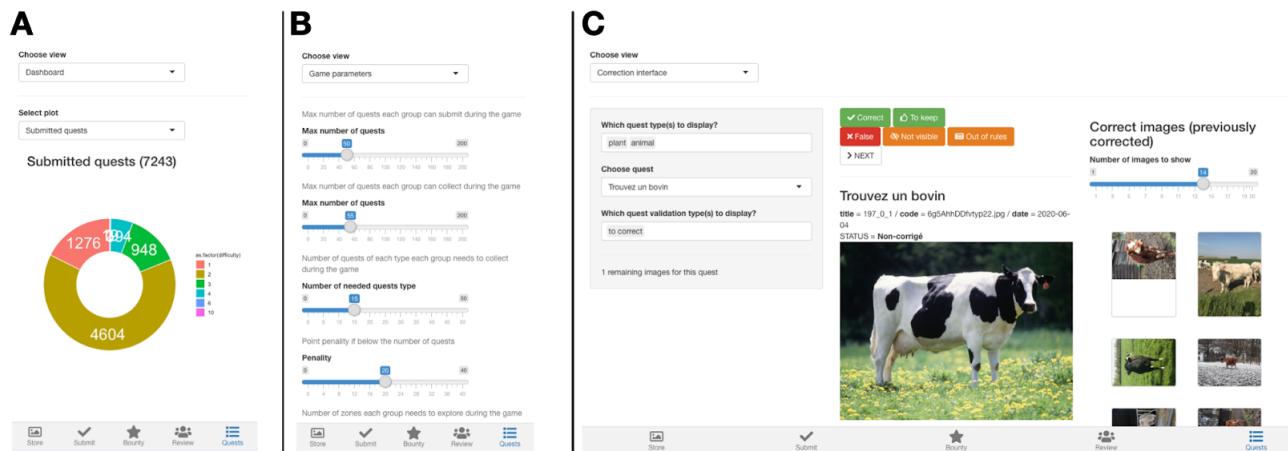

256 **Figure 2 : Overview of the different panels of the admin interface.** A. Overview of the advancement of the  
258 game. For instance, educators can see how many pictures have been submitted and which proportion of these  
pictures has been evaluated. B. Game parameters. Educators can change the main game parameters directly  
260 through the web interface. C. Correction interface. The correction interface was designed to allow a quick and  
efficient correction process by the educators. The educator chooses a specific quest to evaluate, then simply  
clicks on the relevant feedback button. The right panel shows examples of previously validated images.

262

## The 2020 activity

264 In Spring 2020, we organised the activity with a roster of 346 first year  
bachelor students from the Bioengineering Faculty of the UCLouvain  
(Belgium). Students were spread in 346 groups (it was therefore set up as an  
266 individual activity). Although students had to do the activity individually, we  
encouraged them to discuss the different quests and collect them together, as  
268 long as everyone took their own pictures. Each group was allowed to submit a  
maximum of 50 pictures. 285 quests were created, divided in 175 plant  
270 quests and 110 animal quests.

272 Specific restrictions were added to the game. A minimal number of animal and  
plant quests had to be collected by each group. Groups were also asked to

274 collect pictures in different zones and biotopes (tab. 2) around the University  
campus, in Louvain-la-Neuve (Belgium).

276 The activity started on February 11. We had to pause the activity for 20 days  
at the beginning of the lockdown due to the COVID19 crisis. During that  
278 pause, we implemented the peer-evaluation in the web interface (it was not  
part of the interface initially). The activity resumed on the 3d of April and  
280 finished on the 15th of May. For the second phase of the activity, during the  
lockdown, all restrictions (quests groups and zones) were lifted as many  
students had returned to their home far away from the campus.

282 At the end of the activity, we sent an anonymous feedback form to the  
students and received 125 answers.

284 **Table 2 : Description of the different zones defined for the 2020 activity.**  
The total area of the game was 11.71 km<sup>2</sup>

| Zone name        | Description                      | Area [km <sup>2</sup> ] |
|------------------|----------------------------------|-------------------------|
| Bois de Lauzelle | Woody area                       | 4.85                    |
| Hocaille         | Urban area                       | 0.92                    |
| Lac              | Lake area                        | 0.18                    |
| Bruyères         | Urban area                       | 0.75                    |
| Bois des Rêves   | Woody area                       | 1.4                     |
| Lauzelle-Centre  | Urban area                       | 0.8                     |
| Vieusart         | Agricultural area                | 1.81                    |
| Biéreau-Baraque  | Urban area with communal gardens | 1.0                     |

## 286 Biological data collection

288 A total of 6543 pictures were submitted by students during the 2020 activity.  
Figure 3 shows the repartition of the submitted pictures by the students  
during the activity. Figure 3A & B show the difference before and after the  
290 lockdown imposed during the COVID-19 crisis.

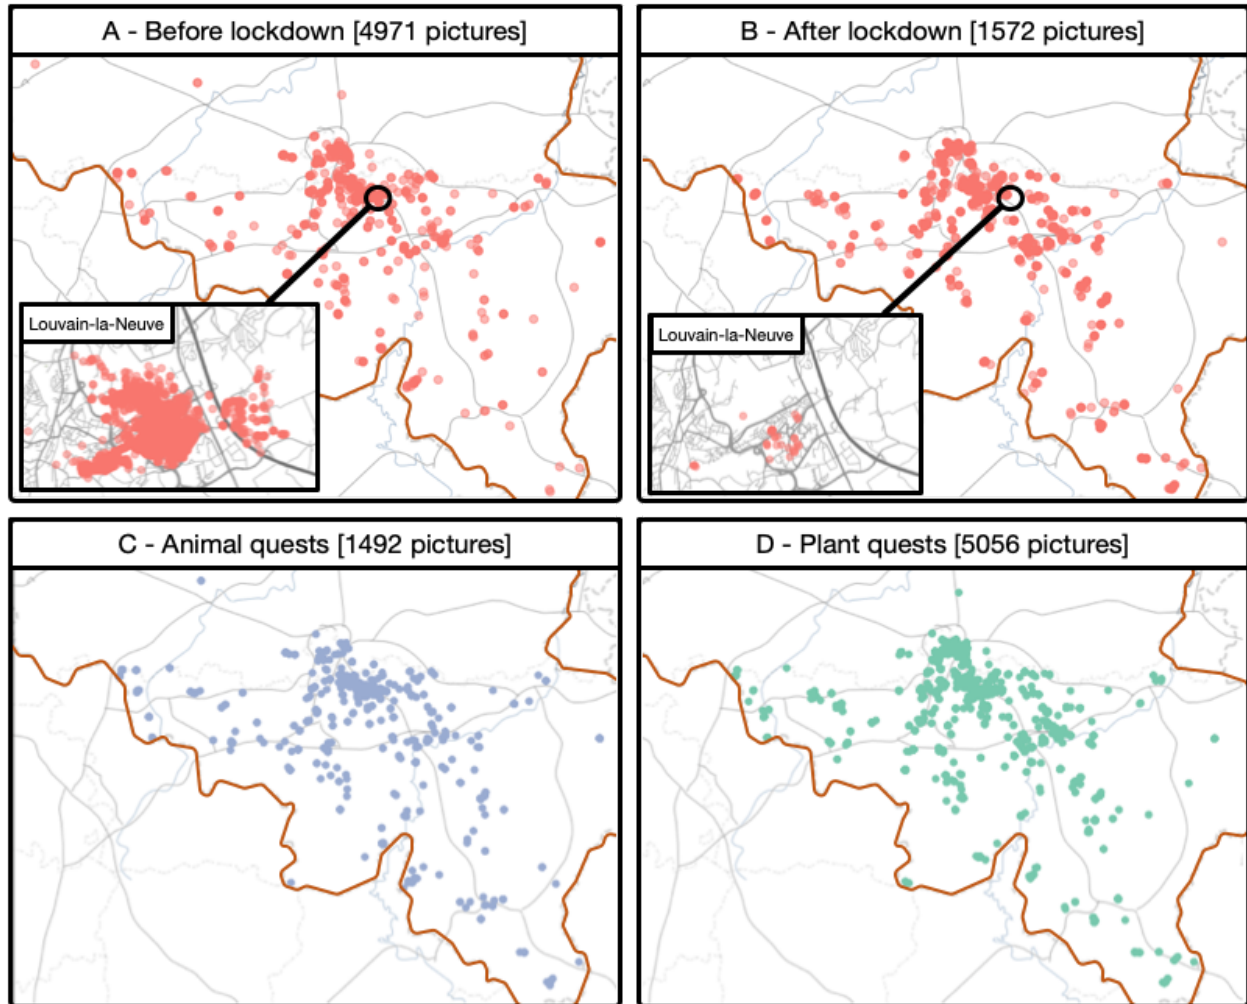

292 **Figure 3 : Overview of the data collected during the 2020 QuoVidi activity at the UCLouvain ( Belgium).** A.  
293 Pictures collected before the lockdown due to the COVID-19 crisis. B. Pictures collected after the lockdown. C.  
294 Animal quests collected during the whole activity. D. Plant quests collected during the whole activity. The  
295 belgian border is indicated in red

296 Before the lockdown, as we asked students to take pictures around the  
297 university, most of them were taken in Louvain-la-Neuve. During the  
298 lockdown, almost no pictures were taken in Louvain-la-Neuve, as students  
299 went back home. The lockdown reduced the number of collected pictures, but  
300 did not stop it. This is due to several reasons. At the beginning of the activity,  
301 we encouraged students to look for quests in groups, to foster peer-learning  
302 between them. This was not possible anymore during the lockdown. The  
303 collection of biological data was also influenced by the direct surroundings of  
304 the students. Students living in an urban area were potentially at a  
disadvantage compared to students in the countryside.

306 However, because we included the photo quiz module at the beginning of the  
308 lockdown, every student could continue the activity. Figure 4 shows, for every  
group, the proportion of points acquired either with the quests collection or  
the photo quiz. We can see that the dual system allowed students to choose  
different strategies, to adapt to their individual lockdown conditions.

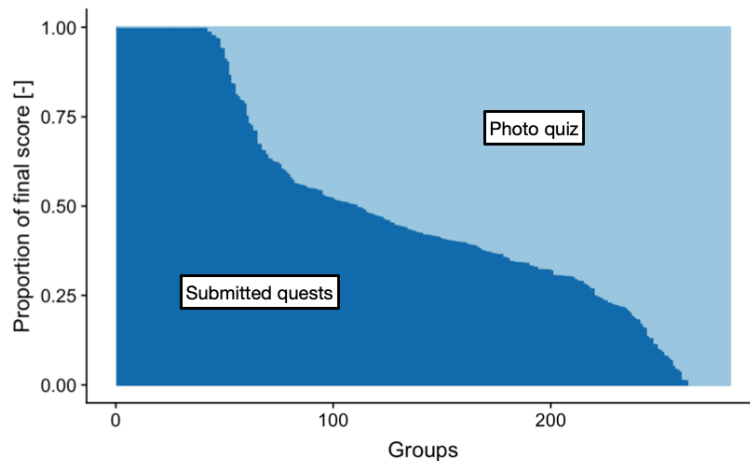

Figure 4 : Proportion of submitted pictures and photo quiz points for each group.

310 We also observed a strong trend toward the collection of plant-related quests  
312 by the students (fig. 3C & D). This is probably due to the fact that, in an urban  
314 setup, plants are easier to find than animals. For an inexperienced naturalist, it  
is also probably easier to take pictures of plants than animals that have a  
tendency to escape. All the pictures can be viewed interactively at the address  
<http://2020.quovidi.xyz>

## 316 Student accuracy

318 Overall, we observed a high correctness in the students picture submissions  
(fig 5A). For the treasure hunt and the picture collection, only 10% and 14%  
320 of the quests (for the animal and plant, respectively) were assessed as  
incorrect by ourselves. One reason for such a high accuracy from the students  
322 might be the high level of engagement required by the activity. They have to  
learn the vocabulary and discuss with other students, and go outside often in  
324 groups to find what they have identified as appropriate for a quest  
submission. In the ICAP framework [3], we believe this corresponds to the  
“Interactive learning” level, enabling the highest learning capabilities.

326 Interestingly, we also observed a much lower accuracy for the photo quiz (fig.  
5B). For that activity, 37% and 38% of the evaluations by the students (for

328 the animal and plant, respectively) were incorrect. This can be due to several  
330 factors. First, contrary to the treasure hunt in itself, the evaluation activity  
332 requires a lesser level of engagement by the student. The activity is indeed  
334 “reduced” to click on a button in front of a computer screen. Second,  
depending on the quality of the picture to evaluate, said evaluation could be  
challenging. We tried to keep only good pictures for that activity, but the  
quality remained nonetheless variable.

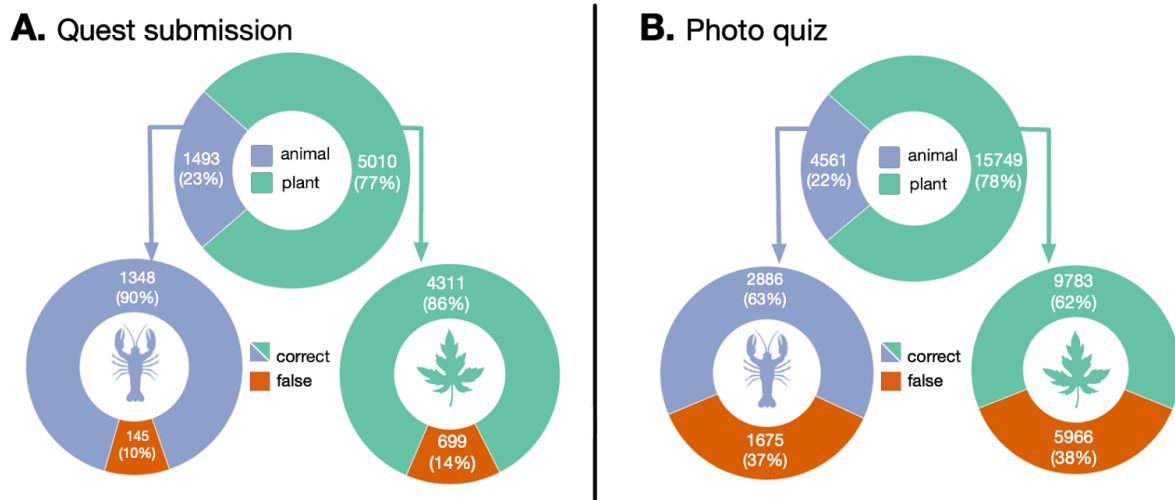

336 **Figure 5 : Performance of the students for the quest submission (A) and photo quiz (B) activities.** In each  
panel, the top chart represents the proportion of plant and animal quests. The bottom panels represent, for  
each type, the proportion of correct and false submissions / corrections

### 338 **Students feedback**

340 Overall, the activity was very well appreciated by the students. With a few  
342 exceptions, students like going outside to observe their surroundings and  
344 collect the quests. In a survey performed after the activity (fig. 6), 125  
students reported to like the activity and have the feeling to have learned  
during it. Many students spontaneously expressed their enthusiasm for this  
activity (tab. 3).

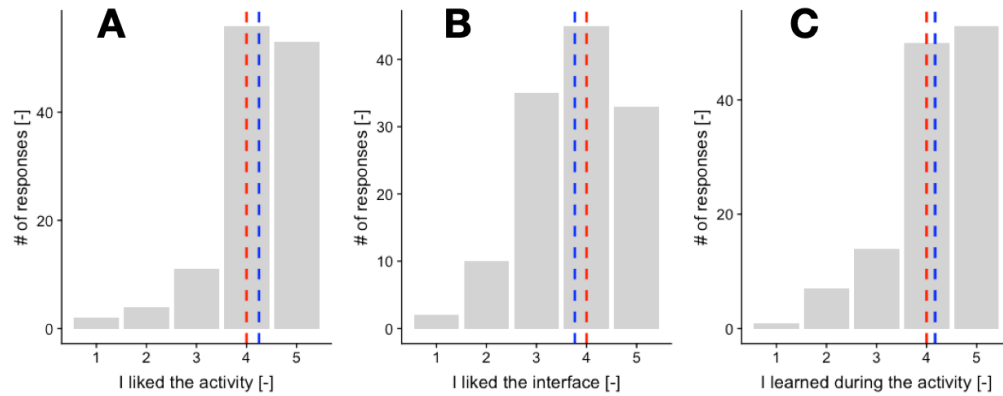

346 **Figure 6 : Feedback from the students.** A. Global appreciation of the activity by the students. B. Appreciation of  
348 the web interface. C. Self assessment of learning during the activity. The numbers on the x-axis represent an  
increasing level of agreement with the statement presented, from strongly disagreed (1) to strongly  
agreed (5). Dashed red line represents the median while the dashed blue line represents the mean of the  
evaluation.

350 **Table 3 : Selected comments from the students received with the feedback form.**

#### Selected comments from the students

“Great activity to learn new concepts and look at our environment in a different way.”

“I think the game is fun and interactive, it's a great way to learn by seeing things "in real life" and also to decipher the quests.”

“Very nice way to propose the course, it pushes the students to discover the surrounding nature in a playful way.”

## Discussions and perspectives

### 352 Remote learning through a centralised game

354 The QuoVidi platform was created for several reasons. We wanted students  
to learn and know specific plant and animal vocabulary, but we did not want to  
356 just give them a list of words to be memorized and repeated. We also wanted  
them to explore and learn to observe their direct environment. We wanted to  
358 show them that you do not need to go to a tropical forest to be able to see a  
great diversity of plant and animal forms and species. We wanted to spark a

360 strong interest in their surrounding natural world. Finally, we were also  
361 working with strong practical constraints. We needed to design an activity  
362 that was scalable for hundreds of students, without the need to increase the  
363 number of educators. This was possible, thanks to the current technologies  
364 (camera, mobile network and GPS localisation) available in almost every  
mobile phone.

366 With the creation of the web-platform for QuoVidi, we have met all those  
367 goals. The treasure hunt (and to a lesser extent the photo quiz) strongly  
368 motivates students to learn and remember the different technical terms used  
369 in the quests. Then they have to apply these new terms directly in the field.  
370 The gamification process (quests, score points, personal progress panel and  
scoreboard between all the groups) is also a strong incentive to engage in the  
activity.

372 The activity is also highly scalable. The number of participants is, from a  
373 technical point of view, only limited by the capacity of the server on which the  
374 platform is installed. The main limitation remains the expert correction step.  
375 As every single picture needs to be validated, the evaluation can quickly  
376 require a lot of time from the educator, even though we tried to make the  
377 process as efficient as possible. We hope in the future that the platform  
378 would benefit from advances in artificial intelligence algorithms to help  
correct the images (see below).

380 Finally, the activity is completely decentralised, which has been a great asset  
381 during the COVID-19 crisis. Students can collect quests at any time and place,  
382 making it easy to adapt to every individual situation. If they cannot go outside,  
383 or are not in a nature-rich environment, they can still participate in the  
384 activity via the peer evaluation module. From the educator point of view, all  
385 the management and corrections can be done from anywhere, as long as they  
386 have access to a computer and an internet connection. As such, the platform  
387 was a real asset during the lockdown period (13 March to 8 of June in  
388 Belgium), as it enabled us to continue the activity almost seamlessly.

## Reusing the image database

390 Similarly to citizen science projects, the use of our platform allows the  
391 collection of large numbers of geotagged, dated images of plant and animal  
392 structures. By helping create such a database over the years, the students are  
393 taking an active role in creating a valuable research resource. This in itself is  
394 viewed by the students as a motivational element of the activity.

396 Such databases could be re-used in different ways. From an educational point  
of view, the images collected could be used to create a quiz to rehearse the  
398 vocabulary the following year. The student would therefore create their own  
teaching and rehearsal material. An example of a quiz created with the  
students pictures is visible here : <http://quiz.quovidi.xyz> .

400 From a research point of view, an ever growing database of annotated plant  
and animal pictures (describing either organ, species or groups), on a limited  
402 and well defined area would be a valuable resource. As each record of the  
database has been validated by an expert (the educators), such a database  
404 could be used in research projects.

406 Another interesting valuation of the database would be to reuse it to train  
deep learning recognition algorithms. Again, given the size and potential  
408 growth of the database, it will be an interesting resource to train machine  
learning models to recognise plant and animal structures. Such models could,  
in turn, be integrated into the platform to help with the correction.

## 410 Collaborations between groups

412 So far, we use the QuoVidi framework within a single classroom (even if it was  
a very large one). Since the activity is entirely centralised online, we could  
414 imagine collaboration between remote classrooms. Students from different  
regions, countries or continents could participate in the same activity, hence  
increasing the degree of diversity of the observations.

## 416 Expanding to new disciplines

418 Here we exemplified the use of our platform with a biological treasure hunt.  
Students were asked to find, in the field, plant and animal structures.  
420 However, due to its flexibility, the platform could be used to organise large  
scale treasure hunts in any context.

422 It could be used in architecture, design or geology classrooms, with quests  
related to different building structures, street art or rock, respectively. It  
could be used with children, with simplified quests, or with more advanced  
424 students, with more complex ones. In short, we expect the concept could be  
used in any context to deal with structures present in the “outside” world.



426

## Conclusions

428

We presented in this manuscript a new open-source web platform for the organisation for large tresor hunt, QuoVidi.

430

During the Spring 2020, in the midst of the COVID-19 crisis, we successfully used the QuoVidi platform with more than 300 students, and allowed the collection of more than 6000 geotagged plant and animal pictures. The decentralised nature of the platform enabled us to ensure a continuity in our teaching, despite the nation-wide lockdown.

432

434

We expect QuoVidi to be of interest for any teaching activity focused on the identification of real-world structures. QuoVidi is available at the address

436

<http://www.quovidi.xyz>

## Authors contributions

|                   | GL | CD | LL | AG | JFR |
|-------------------|----|----|----|----|-----|
| Conceptualisation | X  | X  | X  |    | X   |
| Formal analysis   | X  |    |    |    |     |
| Methodology       | X  | X  | X  |    | X   |
| Ressources        | X  |    |    |    | X   |
| Software          | X  |    |    | X  |     |
| Supervision       | X  |    |    |    | X   |
| Visualisation     | X  |    |    |    |     |
| Original draft    | X  | X  | X  | X  | X   |

438

## Acknowledgments

440

QuoVidi, then called BioGO, was one of the laureates of the “Prix Wernaers pour la vulgarisation scientifique” in 2020.

---

## References

- 442 1. Freeman S, Eddy SL, McDonough M, Smith MK, Okoroafor N, Jordt H, et al.  
444 Active learning increases student performance in science, engineering, and  
mathematics. *Proc Natl Acad Sci U S A*. 2014;111: 8410–8415.
- 446 2. Chi MTH, Adams J, Bogusch EB, Bruchok C, Kang S, Lancaster M, et al.  
Translating the ICAP Theory of Cognitive Engagement Into Practice. *Cogn  
Sci*. 2018. doi:10.1111/cogs.12626
- 448 3. Chi MTH, Wylie R. The ICAP Framework: Linking Cognitive Engagement to  
Active Learning Outcomes. *Educ Psychol*. 2014;49: 219–243.
- 450 4. Haak DC, HilleRisLambers J, Pitre E, Freeman S. Increased structure and  
452 active learning reduce the achievement gap in introductory biology. *Science*.  
2011;332: 1213–1216.
- 454 5. Kapp BKM. Games, Gamification, and the Quest for Learner Engagement. In:  
Main [Internet]. 8 Jun 2012 [cited 17 Jun 2020]. Available:  
456 [https://www.td.org/magazines/td-magazine/games-gamification-and-the-qu  
est-for-learner-engagement](https://www.td.org/magazines/td-magazine/games-gamification-and-the-quest-for-learner-engagement)
- 458 6. Alsawaier RS. The effect of gamification on motivation and engagement.  
*International Journal of Information and Learning Technology*. 2018. pp.  
56–79. doi:10.1108/ijilt-02-2017-0009
- 460 7. Chang W, Borges Ribeiro B. shinydashboard: Create Dashboards with  
462 “Shiny.” 2018. Available:  
<https://CRAN.R-project.org/package=shinydashboard>
- 464 8. Chang W, Cheng J, Allaire J, Xie Y, McPherson J. Shiny: web application  
framework for R. 2017. Available:  
<https://cran.r-project.org/web/packages/shiny/index.html>
- 466 9. Perrier V, Meyer F, Granjon D. shinyWidgets: Custom Inputs Widgets for  
Shiny. 2019. Available: <https://CRAN.R-project.org/package=shinyWidgets>
- 468 10. Bailey E. shinyBS: Twitter Bootstrap Components for Shiny. 2015. Available:  
<https://CRAN.R-project.org/package=shinyBS>
- 470 11. Cheng J. miniUI: Shiny UI Widgets for Small Screens. 2018. Available:  
<https://CRAN.R-project.org/package=miniUI>
- 472 12. R Special Interest Group on Databases (R-SIG-DB), Wickham H, Müller K.  
474 DBI: R Database Interface. 2018. Available:  
<https://CRAN.R-project.org/package=DBI>
- 476 13. Müller K, Wickham H, James DA, Falcon S. RSQLite: “SQLite” Interface for R.  
2018. Available: <https://CRAN.R-project.org/package=RSQLite>
- 478 14. Ooms J. magick: Advanced Graphics and Image-Processing in R. 2020.  
Available: <https://CRAN.R-project.org/package=magick>

- 480 15. Dunnington D, Harvey P. exifr: EXIF Image Data in R. 2019. Available:  
<https://CRAN.R-project.org/package=exifr>
- 482 16. Wickham H. tidyverse: Easily Install and Load the “Tidyverse.” 2017.  
Available: <https://CRAN.R-project.org/package=tidyverse>
- 484 17. Golemund G, Wickham H. Dates and Times Made Easy with lubridate.  
Journal of Statistical Software. 2011. pp. 1–25. Available:  
<http://www.jstatsoft.org/v40/i03/>
- 486 18. Wilke CO. cowplot: Streamlined Plot Theme and Plot Annotations for  
“ggplot2.” 2019. Available: <https://CRAN.R-project.org/package=cowplot>
- 488 19. Ren K, Russell K. formattable: Create “Formattable” Data Structures. 2016.  
Available: <https://CRAN.R-project.org/package=formattable>
- 490 20. Xie Y, Cheng J, Tan X. DT: A Wrapper of the JavaScript Library “DataTables.”  
2019. Available: <https://CRAN.R-project.org/package=DT>
- 492 21. Wickham H. Tools for Splitting, Applying and Combining Data [R package plyr  
version 1.8.6]. [cited 25 Jun 2020]. Available:  
494 <https://CRAN.R-project.org/package=plyr>
- 496 22. Cheng J, Karambelkar B, Xie Y. leaflet: Create Interactive Web Maps with the  
JavaScript “Leaflet” Library. 2018. Available:  
<https://CRAN.R-project.org/package=leaflet>
- 498 23. Abdaoui A, Azé J, Bringay S, Poncelet P. Feel: a french expanded emotion  
lexicon. Language Resources and Evaluation. 2017;51: 833–855.
- 500 24. Apache License, Version 2.0 | Open Source Initiative. [cited 5 Jun 2020].  
Available: <https://opensource.org/licenses/Apache-2.0>
